# Supplementary material
Source: Springer Nature journal article supplement (https://www.springermedizin.de/resource/supplementary/12891_2010_1108_MOESM1_ESM.pdf/9507744)
Supplement: MOESM1 [file 9507744]

Neck and low back pain  
n=240

MPI-S non-responders  
n=50

MPI-S responders  
n=190

Incomplete/non-  
classifiable MPI-S  
questionnaire  
n=64

MPI-S study group  
n=126

ID  
n=40

DYS  
n=21

AC  
n=65
